# Supplementary material
Source: Research Square preprint supplement (doi:10.21203/rs.3.rs-8671339/v1)
Supplement: Supplementary file 1 [file 0527e51960c6bd62c4918c20.docx]

Online supplementary file 3

Thematic analysis matrix for P1 to P11 and the focus group

P = Participants

| P | **Transcript Excerpt (Quote or Segment)** | **Initial Code (Short Label)** | **Category/Cluster (Group of Related Codes)** |  |  |
| --- | --- | --- | --- | --- | --- |
| P1 | *“I always feel very hyper-visible and, often, invisible actually… only valued when it’s to do with equity and diversity issues.” p. 4* | 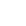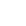  | Hyper/invisibility; Conditional recognition | | --- | | 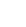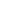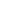  | Hyper/invisibility; Conditional recognition | | --- | |  | **1. Structural and Institutional Racism** |
|  | *“She said, ‘Do they want us just to black up all the faces of our lecturers?’… I was so shocked, I didn’t know what to do.” p. 5* | Shock at racist comment; Silence of bystanders | Shock at racist comment; Silence of bystanders |  |
|  | “people and structures that create hostile environments in a workplace for those of us who are marginalised and minoritised. In predominantly white spaces, it means that you are either implicitly or explicitly always at a disadvantage” (P1, p. 16). |  |  |  |
|  | *“He got increasingly hostile towards me… then claimed I was hostile, aggressive — all these tropes and stereotypes.” p. 7* | Reversal of blame; Racialised stereotypes | 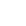  | Reversal of blame; Racialised stereotypes | | --- | |  |
|  | *“On the panel… she mocked me, called me ‘woke,’ made fun of my hair… and the chair said nothing.” p. 8* | Public humiliation; Lack of allyship | 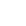  | Public humiliation; Lack of allyship | | --- | |  |
|  | *“The grievance process took 18 months… I had to relive trauma over and over again.” p. 9* | Prolonged grievance process; Retraumatization | 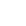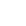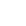  | Workplace isolation | | --- | |  |
|  | *“Because my confidence levels were so low…there were opportunities to collaborate on things…[that I just] didn’t feel confident enough to take” (P1, p. 15&16).* |  |  |  |
|  | *“They told me to use workplace well-being online… no culturally specific support offered.” p. 12* | Lack of support; Inadequate counselling | 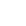  | Lack of institutional support | | --- | |  |
|  | *“I couldn’t go into the office… anxiety led to depression… I was signed off sick.” p. 14* | Lost opportunities; Economic impact | Criminalisation and surveillance of Black professionals |  |
|  | *“There were opportunities I couldn’t take… research bids I couldn’t apply for.” p. 15* | Peer solidarity; External support | 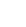  | Hidden surveillance / dossier | | --- | |  |
|  | *“I wanted to leave my job… but support from colleagues helped me stay.” p. 14* | Definition of racism; Unequal labour | 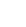  | Isolation as only Black engineer | | --- | |  |
|  |  | Responsibility to future staff; Protecting others | Professional racism; Racism with a smile |  |
| P2 | “I was the only Black teacher there… it was quite isolating.” p. 25 | Workplace isolation | Overt racist abuse |  |
|  | “I reported it to the headteacher, who showed no interest… I had to write an email myself.” p. 28 | Lack of institutional support | Rigged system; exclusion |  |
|  | “They said they were afraid to use the word ‘Black’ around me.” | Racial stereotyping (“angry Black woman”) | White control of Black narratives |  |
|  | “From that moment on, my mental health deteriorated… I became depressed, stopped eating, lost weight.” p. 35 | Mental health decline | Definition of workplace racism |  |
|  | *“While I was suspended, I remained on full pay.”* | Financial resilience | 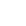  | Unequal treatment of errors | | --- | |  |
|  | *“The first one was applying for an assistant headteacher role four times at the same school. Despite being an experienced teacher, holding the right qualifications, having completed a management course, and leading departments without receiving additional pay—I was told I wasn’t successful each time…I was overlooked despite being qualified. That’s institutional racism” (p. 28)* |  |  |  |
|  | “Most of my support came from my GP, counselling, and the Black Teachers Network.” p. 40 | Support systems | Racial disparity in support |  |
|  | “A part of your university course must include something that talks about racism.” | Need for education/training | Glass ceiling for Black staff |  |
|  | “If you’re going to sack me for talking about racism, then I don’t need to be there.” p. 43 | Refusal to be silenced | Covert racism |  |
|  | “I know they need me, but I have to protect my mental health.” | Conflict between self-care and representation | Barriers to promotion |  |
|  | “At 51, I have to rebuild my life again… What do I do now?” p. 75-76 | Career disruption and loss | Unequal enforcement of policy |  |
|  |  | Avoidance of full-time employment due to racism trauma | Inconsistent application of rules |  |
| P3 | *“I feel I wouldn’t be able to take on a full-time role with the same people consistently—it would just be too traumatic, based on what I’ve been through before.” p. 53* | Silencing and denial of racist misconduct | Institutional sabotage |  |
|  | *“A sergeant came in and said to me, ‘Oh, I heard you weren’t very happy with how the offender was being treated. Well, you didn’t see anything.’… And he said, ‘I’m telling you—you didn’t see anything.’” p. 58* | Criminalisation and surveillance of Black professionals | Distrust of complaint systems |  |
|  | *“I was suspended—for three months… They tapped my phone. They also put surveillance across the road from my house… So it was almost like I was being criminalised.” p. 60* | Loss of innocence and increased cynicism | Structural exclusion |  |
|  | *“That experience really took away a lot of my innocence—my rose-tinted, idealistic approach to life. I became much more cynical—much more cynical. Even now, I think I’m a bit more… maybe paranoid.” p. 65* |  | Surveillance & Policing of Black Staff |  |
|  | *“I had to really just delve into my relationship with God and just get my strength and in a way that’s a good thing. Anyway, it helps. Helped my relationship like get stronger.” p. 65* | Reliance on faith as resilience | Retaliatory Termination & Procedural Injustice |  |
|  | *“Because I’m more self-employed now, if I don’t want to be around certain behaviours in a particular organisation, I can just say, ‘Let me take a couple of weeks off from there.’” p. 68* | Autonomy in self-employment as safeguard | Unequal Treatment & Double Standards |  |
|  | *“Organizations often rely on people not reading those policies. But once you do, you start to see the contradictions and loopholes in their systems. And that gives you power. Knowledge is power.” p. 76* | Empowerment through policy literacy | Exclusionary Workplace Culture |  |
|  | *“Acknowledge the trauma that communities who’ve experienced racism carry. Put things in place that actively support and respond to that trauma.” p. 76* | Call for institutional accountability and trauma-informed practice | Unequal Response to Complaints |  |
|  |  | Emphasis on professionalism | Prolonged grievance process; Retraumatization |  | **2. Psychological and Health Consequences of Racism** |
| P4 | “I like to emphasize professionalism…some people could use [discrimination] as a cover…let it not be on the basis of incompetence.” p. 83 | Hidden surveillance / dossier | Lack of support; Inadequate counselling |  |
|  | “I didn’t know that the senior engineer…was keeping a dossier…they pulled out most of these things I am talking about. I almost fainted.” p. 83 | Isolation as only Black engineer | Psychological harm; Avoidance behaviours |  |
|  | “I was just thinking—why is this happening to me? I was almost the only ethnic minority person…the only Black person, on that site.” p. 85 | Contribution saving company | Mental health decline |  |
|  | “The man that we wanted to dismiss…has just saved the company hundreds of thousands of pounds.” p. 85 | Reliance on faith | Loss of innocence and increased cynicism |  |
|  | “I prayed about these things…you can’t survive such a situation without having a panic attack.” p. 86 | Transition to academia | Burnout and stress |  |
|  | “So my wife brought me an advert…before I could even drive back to work, they had given me the job.” p. 86 | Strategic resistance using legal rights | Fear of health breakdown/death |  |
|  | “Another ethnic minority person…did Freedom of Information requests…they decided to pay him off.” p. 89 | Managerial obstruction / payoff | Psychological toll of racism |  |
|  | “I was running a training course, and [my manager] came in and stopped it…they paid me some money, and I left the college.” p. 91 | Hostile work environment | Racialised mental-health burden |  |
|  | “There’s nothing as bad as going into a workplace and knowing that people don’t want you to do well.” p. 94 | Open hostility from colleague | Emotional Burden on Black Women |  |
|  |  | Professional racism; Racism with a smile | Simmering rage; Black fatigue |  |
| P5 | “I would say there’s a lot of institutional denial… racism that comes with a smile.” p. 99 | Shared understanding of racism metaphor | Minimising personal experience |  | **3. Cultural Stoicism, Internalised Racism & Silenced Resistance** |
|  | “Because Black people understand that straightaway… they understand as soon as I say it.” p. 101 | Overt racist abuse | Intersection of race and gender |  |
|  | “In policing… overt racist language, use of the N-word.” p. 103 | Diversity hire stigma | Internalised questioning/doubt |  |
|  | “I was told I was a diversity hire, even though I’m more qualified…” p. 104 | Simmering rage; Black fatigue | Lack of recognition/erasure |  |
|  | “James Baldwin talks about a simmering rage… Black fatigue is real.” p. 105 | Rigged system; exclusion | Tokenism without empowerment |  |
|  | “The game’s rigged… they don’t know what to do with you sometimes.” p. 107 | Self-created support networks | Silencing racism |  |
|  | “I set up a Black women’s academic group… created our own support systems.” p. 113 | Disillusionment with academia | Underrepresentation |  |
|  | “I thought academia would be a safer haven… it’s still there.” p. 114 | Family expectations; cultural pressure | Absence of role models |  |
|  | “White people have white expectations of me… my mum’s a doctor.” p. 116 | Resilience in adversity | Gendered Silence |  |
|  | “Doing academia—being a Black academic—is not for the faint-hearted.” p. 118 | Call for anti-racist reform | Cultural stoicism |  |
|  | “We need definitive anti-racist policies and practices… cyclical training… punishments for racism.” p. 125 | Bullying and blocked career progression | Angry Black Woman Stereotype |  |
|  |  | Accent-based discrimination | Fear of retaliation / blacklisting |  |
| P6 | In Berkshire, however, I was subjected to bullying and harassment by two white managers… I faced a lot of career progression blocks.” p. 132 | Pyrrhic victories | Internalised Racism & Competition |  |
|  | “This colleague… had been consistently turned down because of her accent.” p. 132 | Burnout and stress | Family expectations; cultural pressure |  |
|  | “Winning doesn’t come with any real prize—it just means you’re not dismissed.” p. 133 | Exclusion and erasure | Lost opportunities; Economic impact |  | **4. Economic Exploitation and Career Precarity** |
|  | “I had burnout… classified by the WHO as an international disease.” p. 134 | Tokenism | Career disruption and loss |  |
|  | “Managers would greet the white colleagues but completely ignore me.” p. 135 | Collective resistance | Avoidance of full-time employment due to racism trauma |  |
|  | “I am the only Black leader in my office in Berkshire.” p. 136 | Black pride as resilience | Autonomy in self-employment as safeguard |  |
|  | “Black colleagues are starting to come together and say, ‘Yes, I can fight.’” p. 143 | White control of Black narratives | Managerial obstruction / payoff |  |
|  | “My pride is what keeps me fighting. I feel my Blackness is my strength.” p. 139 | Definition of workplace racism | Hostile work environment |  |
|  | “Black History Month… was white-led… they even vet who sits on panels.” p. 147 & 149 | Fear of health breakdown/death | Pay disparity based on ethnicity |  |
|  | “Workplace racism… being treated unfavourably on the grounds of your race… segregation.” p. 151 | Advocacy and mentoring | Sudden dismissal without cause |  |
|  | “I don’t want to die… I don’t want to keep seeing Black colleagues go through this.” p. 138 | Pay disparity based on ethnicity | Reassignment linked to ethnicity |  |
|  | “Support each other… don’t ignore it… read up on policies.” p. 143 | Sudden dismissal without cause | Economic hardship due to racism |  |
|  |  | Reassignment linked to ethnicity | Exploitation of migrant worker |  |
| P7 | “The advertised rate of pay was £500 a day… a few hours before the interview, they called me and said the rate had been changed to £450… Later I discovered everyone else was still on £500.” p. 155 | Subtlety of racism | Financial strain |  |
|  | “My contract was terminated while I was on holiday… despite being commended for my work.” p. 157 | Discrimination across groups | Under-employment despite qualification |  |
|  | “If I had been a contractor, maybe they would have simply terminated my contract… instead, they just moved me to a different team.” p. 158 | Lack of formal reporting | Immigration dependency / coercion |  |
|  | “Discrimination… is very subtle in the sense that any reason can be given to get rid of you.” p. 166 | Emotional and economic impact | Economic Consequences of Racism |  |
|  | “When someone doesn’t look like you, that’s often when discrimination happens… birds of a feather flock together.” p. 159 | Family and peer support | Peer solidarity; External support |  | **5. Empowerment, Solidarity & Pathways for Reform** |
|  | “I wouldn’t say I have ever formally reported any incident as racism.” p. 160 | Overcompensation advice | Responsibility to future staff; Protecting others |  |
|  | “Being sacked while on holiday… it ruined my holiday, was demoralising, painful, and I lost money.” p. 162 | Definition of racism | Support systems |  |
|  | “What helped me cope was the support and reassurance I received from my wife… and colleagues who said, ‘You’re good, you know your stuff.’” p. 163 | Language exclusion | Need for education/training |  |
|  | “As a Black person, you may need to work ten times harder.” p. 164 | Signs of improvement | Refusal to be silenced |  |
|  | “Workplace racism, to me, is when it becomes obvious that someone is favouring people from their own ethnic background.” p. 165 | Policy vs practice gap | Reliance on faith as resilience |  |
|  | “They were speaking in their local language… I said, ‘Do I need to go and learn Punjabi before I can work with you guys?’” p. 165 | Minimising personal experience | Empowerment through policy literacy |  |
|  | “Things are gradually changing for the better… More and more, Black people are demonstrating they are skilled, hardworking, intelligent.” p. 167 | Intersection of race and gender | Call for institutional accountability and trauma-informed practice |  |
|  | “EDI policy… good to have them, but implementing them is always the challenge.” p. 167 | Internalised questioning/doubt | Contribution saving company |  |
|  |  | Lack of recognition/erasure | Transition to academia |  |
| P8 | “Personally, I haven’t been affected by racism inside my workplace, but I’m not saying it doesn’t happen.” p. 169 | Tokenism without empowerment | Strategic resistance using legal rights |  |
|  | “I definitely feel I’ve been held back, but I couldn’t say whether that’s to do with race or because I’m a woman.” p. 170 | Silencing racism | Self-created support networks |  |
|  | “It was just a series of events where you begin to ask yourself: ‘Is it me? Is it you? Is it racism?’” p. 173 | Underrepresentation | Resilience in adversity |  |
|  | “You’re asked for your ideas, but then your ideas become someone else’s ideas. It gets to the point where you don’t want to say anything.” p. 173 | Absence of role models | Black pride as resilience |  |
|  | “I was the only Black person in that space with any real power, yet I wasn’t being allowed to develop.” p. 173 | Call for radical education | Advocacy and mentoring |  |
|  | “Things just get brushed under the carpet, because nobody likes the term racism.” p. 175 | Demand for UK-based knowledge | Family and peer support |  |
|  | “Out of around 1,000 staff… Black managers made up less than 1%.” p. 179 | Lack of Black leadership representation | Overcompensation advice |  |
|  | “It starts earlier than that—it comes through schools and schooling. I never had a Black teacher.” p. 180 | Microaggressions and dismissal | Signs of improvement |  |  |
|  | “What workplaces really need are films or materials that show racism clearly… make people feel uncomfortable.” p. 182 | Prioritisation of sexism over racism | Policy vs practice gap |  |  |
|  | “For me, I don’t see much British research—I see a lot of American research. I want to know what’s going on on my own doorstep.” p. 184 | Institutional silencing | Call for radical education |  |  |
|  |  | Psychological toll | Representation matters |  |  |
| P9 | “There are still… endemic issues around personal workplace discrimination… very few Black professors or senior staff… Black staff recruited mainly into EDI roles.” p. 187 | Representation matters | Call for genuine change |  |  |
|  | “Recently, I had to report a colleague for behaviour… dismissive… oversensitive.” p. 187 | Call for genuine change | Coping strategies |  |  |
|  | “When I raised the racist element… senior female staff were more upset about the misogynistic comments than about the racial slurs.” p. 188 | Overqualification and inequity | Advice for younger Black staff |  |  |
|  | “HR… make it very clear… pursuing it could make things very difficult for you.” p. 189 | Coping strategies | Survival strategies |  |  |
|  | “Emotionally, it’s exhausting… you don’t always feel safe… you doubt yourself.” p. 190 | Advice for younger Black staff | Spiritual coping |  |  |
|  | “When Black candidates came in and saw me… chair of the panel… sense of relief.” p. 197 | Unequal treatment of errors | Safeguarding concerns ignored |  |  |
|  | “Less lip service. We need real, practical action—not tokenism.” p. 198 | Racial disparity in support | Advice to Black workers |  |  |
|  | *“It’s exhausting after a while. You just get on with your job and ‘take it on the chin,’ even though that’s not healthy” (p. 190)* |  |  |  |  |
|  | “I’m overqualified… MBA, MSc… yet I still don’t feel seen as equal to a white man with two GCSEs.” p. 198 | Glass ceiling for Black staff | Call for empowerment |  |  |
|  | “My family, friends, and faith… external supervision… Black women in senior roles.” p. 200 | Covert racism | Peer solidarity / community support |  |  |
|  | “Be yourself. Stay aware. Write everything down. Find your tribe.” p. 200 | Barriers to promotion | Lack of Compassionate Response |  |  |
|  | “There are still… endemic issues around personal workplace discrimination… very few Black professors or senior staff… Black staff recruited mainly into EDI roles.” p. 187 | Psychological toll of racism | Unequal Compassion |  |  |
|  |  | Economic hardship due to racism | Collective Empowerment through Knowledge |  |  |
| P10 | “I made a medication error… But the way it was handled felt more like systemic racism and institutional discrimination.” p. 204 | Futility of reporting |  |  |  |
|  | “If it had been a White nurse who made that error, that person would have had more support.” p. 205 | Tokenistic policies |  |  |  |
|  | “It’s predominantly Black staff at the bottom, but mostly White managers at the top… I’ve got three Master’s degrees… but still…” p. 206 | Survival strategies |  |  |  |
|  | “It’s not like people come out and say, ‘We’re racist.’ It’s more about their actions and behaviours… very toxic culture.” p. 206 | Withdrawal from work engagement |  |  |  |
|  | “I’ve applied for so many senior and leadership positions… but Black people struggle… while newly qualified White staff climb quickly.” p. 206 | Spiritual coping |  |  |  |
|  | “It makes you feel quite isolated… depression… lack of sleep… But the good thing for me is my spiritual foundation.” p. 207 | Exploitation of migrant worker |  |  |  |
|  | “For the past nine months it has been so hard… I lost my mum… I can’t afford to travel for her funeral… had to go back to Universal Credit.” p. 208 | Racialised workplace gossip |  |  |  |
|  | “Who are you really reporting to?… You’re not going to win—it feels like swimming against the tide.” p. 208 | Unequal enforcement of policy |  |  |  |
|  | “EDI is there, but only on paper… for decoration.” p. 209 | Inconsistent application of rules |  |  |  |
|  | *“Just look after yourself… Challenging things will only exhaust you, because you’re not going to win.” p. 210* | Unfair dismissal |  |  |  |
|  | *"I literally had to say, ‘God, you’re going to have to carry us, because I don’t know how we’re going to cope'... I’ve learned over the years and I have my faith, I believe things will come—and they do". P. 71* |  |  |  |  |
|  | “I’ll go in, do what I’m supposed to do, come home, and then focus on other areas of my life.” p. 212 | First-hand recognition of racism |  |  |  |
|  | “My coping strategies don’t involve drugs or alcohol; instead, it’s my spirituality and my heart… God understands more than human understanding.” p. 207 | Dehumanisation |  |  |  |
|  |  | Financial strain |  |  |  |
| P11 | “Later, I came to find out that this Nigerian teacher was actually being abused under what we call modern-day slavery… she was working full-time… but being paid as a student.” p. 215 | Safeguarding concerns ignored |  |  |  |
|  | “The younger White colleagues… the gossip was always: ‘They make me do all the work.’” p. 216 | Advice to Black workers |  |  |  |
|  | “I was stopped at reception… until I had South African police clearance… but my White colleague from South Africa worked three months without one.” p. 217 | Call for empowerment |  |  |  |
|  | “I developed a tooth abscess… I asked to leave… they turned down my request… but AH was allowed to leave for a family event.” p. 219 | Under-employment despite qualification |  |  |  |
|  | “I was fired in December… none of it holds water… everything they did was outside their own policy.” p. 219 | Immigration dependency / coercion |  |  |  |
|  | *“This was the first experience of racism in that school.” p. 218* | Ageism and sexism intersecting with racism |  |  |  |
|  | *“They made sure it took over three months to get back to me, so that I couldn’t even go to ACAS and claim anything. Everything they did went against their own policy” (p. 225).* |  |  |  |  |
|  | “I felt undervalued, as if I wasn’t even a human being.” p. 227 | Institutional sabotage |  |  |  |
|  | “I started worrying: what am I going to do financially? I have five children. I had to let go of my place, let go of my car.” p. 226 | Racialised mental-health burden |  |  |  |
|  | “Children were being abused… told to lie to parents… dragged around instead of supported properly.” p. 230 | Cultural stoicism |  |  |  |
|  | “Black people must do the right thing… many get into trouble because they don’t understand… you need to know your rights.” p. 232 | Fear of retaliation / blacklisting |  |  |  |
|  | “We’re often scared of losing our jobs, but we need to know that we have rights… many people don’t know this.” p. 234 | Distrust of complaint systems |  |  |  |
|  | The Focus Group | Lack of culturally competent therapy |  |  |  |
|  |  | Tokenism and internalised racism |  |  |  |
|  | Focus Group 1 | Structural literacy gap |  |  |  |
|  | “They put me at the front line, at the lowest level… while I was doing the manager’s work… yet never promoted.” | Peer solidarity / community support |  |  |  |
|  | “They felt they had a hold over me, because I needed my letter… for my permanent stay.” | Resistance / identity pride |  |  |  |
|  | “I was the youngest staff member and a Black female—who, in their view, had no business sitting on a senior leadership team.” | Structural exclusion |  |  |  |
|  | “She refused to sign off my NQT paperwork… deleted the post I was supposed to return to.” | Surveillance & Policing of Black Staff |  |  |  |
|  | “Twelve of them were Black women… all had issues to do with their work.” | Exploitation through Visa Vulnerability |  |  |  |
|  | “We’re told to toughen up and get on with it.” | Retaliatory Termination & Procedural Injustice |  |  |  |
|  | “If you speak up, you risk losing everything.” | Unequal Treatment & Double Standards |  |  |  |
|  | “I was so burnt out. I went off sick for two months because I just couldn’t take it anymore. My body was literally exhausted. I just wanted to get away” (p. 298). |  |  |  |  |
|  | “You’re blowing the whistle to the same people who are part of the problem.” | Lack of Compassionate Response |  |  |  |
|  | “I was referred to a White lady… I thought, ‘What am I doing here?’” | Exclusionary Workplace Culture |  |  |  |
|  | “They strategically look for people who can play those roles… internalised self-hate.” | Angry Black Woman Stereotype |  |  |  |
|  | “I’ve realised how much disposal there is… parents don’t know how to navigate the system.” | Unequal Compassion |  |  |  |
|  | “We need cultural networks in the workplace.” | Gendered Silence |  |  |  |
|  | “Black is not something I aspire to be—it’s what I am.” | Emotional Burden on Black Women |  |  |  |
|  | “The system is not designed for us.” | Invisibility and Erasure |  |  |  |
|  | Focus Group 2 | Unequal Response to Complaints |  |  |  |
|  | “White people are very watchful... they watch what you’re doing wrong... then run to management.” | Internalised Racism & Competition |  |  |  |
|  | “They bullied her and bullied her… they were underpaying her because she’s still on a student visa… that’s called modern-day slavery.” | Collective Empowerment through Knowledge |  |  |  |
|  | *“I had perfect probation reviews… then they fired me after being sick... they said I hadn’t met objectives.”* | Economic Consequences of Racism |  |  |  |
|  | *"I watch movies, listen to music, dance—all of the above. Most times, when I’m stressed, I start cooking or cleaning while dancing. It really helps me." (p. 265)* |  |  |  |  |
|  | *“A white girl missed three weeks… they extended her probation. Why couldn’t they extend mine?”* | Hyper-visibility and Performance Pressure |  |  |  |
|  | *“The so-called “independent investigator” turned out to be one of the principals from their other schools. …So how is that independent? (FG2-3, p. 297).* |  |  |  |  |
|  | *“She became so afraid and emotionally drained that she didn’t even want to see the person who was being racist toward her. She had reported it, but nothing was done, in fact, that person was promoted.” (FG2-7, p. 297)* |  |  |  |  |
|  | *“In my case, I found there was also an Association of Black Academics. If your line manager couldn’t help, you could go to them. They’d share their experiences and guide you: ‘This is what I did,…read this policy …That was really helpful.” (p. 302)* |  |  |  |  |
|  | “When my son was airlifted... I was in hospital... they wanted to get rid of me.” |  |  |  |  |
|  | “Schools can be very incestuous… if you’re not white, you’re not favoured.” |  |  |  |  |
|  | “She said to me: ‘You always look angry’.” |  |  |  |  |
|  | “White child’s father died—headteacher took him out for lunch. Black child’s father died—‘we knew he was going to die.’” |  |  |  |  |
|  | “Men don’t report these issues… they fear being seen as weak.” |  |  |  |  |
|  | “As women, we’re more emotionally invested… these things affect us deeply.” |  |  |  |  |
|  | “They make our issues invisible… how do we engage them when they’re the ones making us invisible?” |  |  |  |  |
|  | “If I report an incident, it should be acted upon like for a white person.” |  |  |  |  |
|  | “Sometimes our own people can be racist towards us… they fear there’s only room for one Black person.” |  |  |  |  |
|  | “We need something like a Citizens Advice Bureau for Black people.” |  |  |  |  |
|  | “I’ve lost my home… I’m staying with a church member… I now work overnight at McDonald’s.” |  |  |  |  |
|  | “As a Black person, you always have to look busy.” |  |  |  |  |
